# Supplementary material for: The Effect of Topology on Block Copolymer Nanoparticles: Linear versus Star Block Copolymers in Toluene
Source: MDPI journal article supplement (doi:10.3390/polym14173691), 2022-09-05
Supplement: s1 [file s1]

**Supporting Information for:**

**The effect of topology on the block copolymer nanoassemblies: linear block  
copolymers versus star block copolymers in toluene**

Yuan Zhang,\* Peng Wang, Nan Li, Chunyan Guo, Sumin Li

Research School of Polymeric Materials, School of Materials Sciences & Engineering,

Jiangsu University, Zhenjiang, 212013, China.

## Materials:

Butanethiol (97%),  $K_3PO_4$  (97%) purchased from Sinopharm Chemical Reagent Co. LTD, China, 1,2-bis(bromomethyl)benzene (>98%, Adamas), 1,3,5-tris-(bromomethyl)benzene (97%, Adamas), and 1,2,4,5-tetrakis(bromomethyl)benzene (95%, Adamas) and benzyl bromide (98%, Shanghai chemical reagent, China) were used without any purification. All other chemical reagents were of analytic grade and were commercially available.

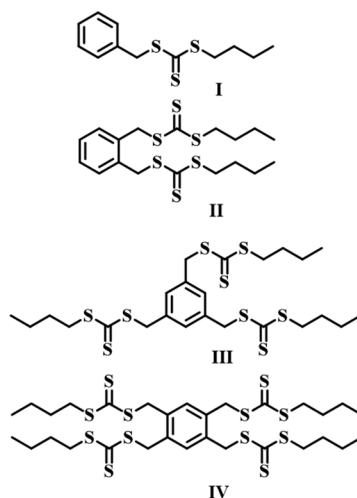

**Scheme S1.** Mono- and Multifunctional Trithiocarbonates.

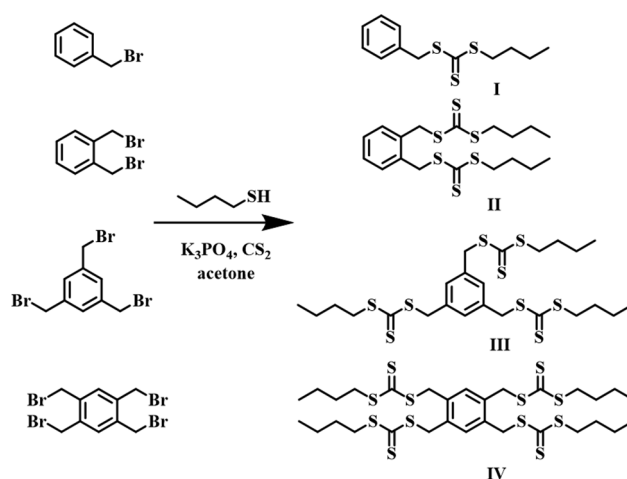

**Scheme S2.** Synthesis of linear and 2, 3, 4-arm CTAs.

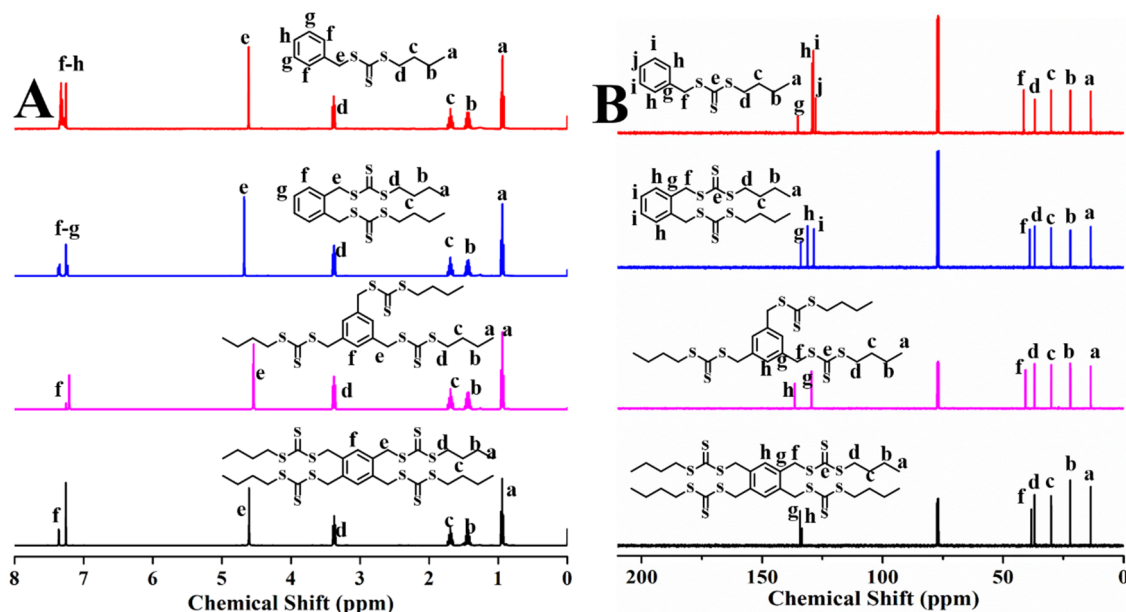

**Figure S1.**  $^1\text{H}$  NMR spectra (A) and  $^{13}\text{C}$  NMR spectra (B) of mono- and multifunctional macro-CTAs of trithiocarbonate. Note: peak e at 220 ppm is out the range of test in the  $^{13}\text{C}$  NMR spectra.

$$M_{n,th} = \frac{[\text{monomer}]_0 \times M_{\text{monomer}}}{[\text{RAFT}]_0} \times \text{Conversion} + M_{n,\text{RAFT}} \quad (\text{eqn S1})$$

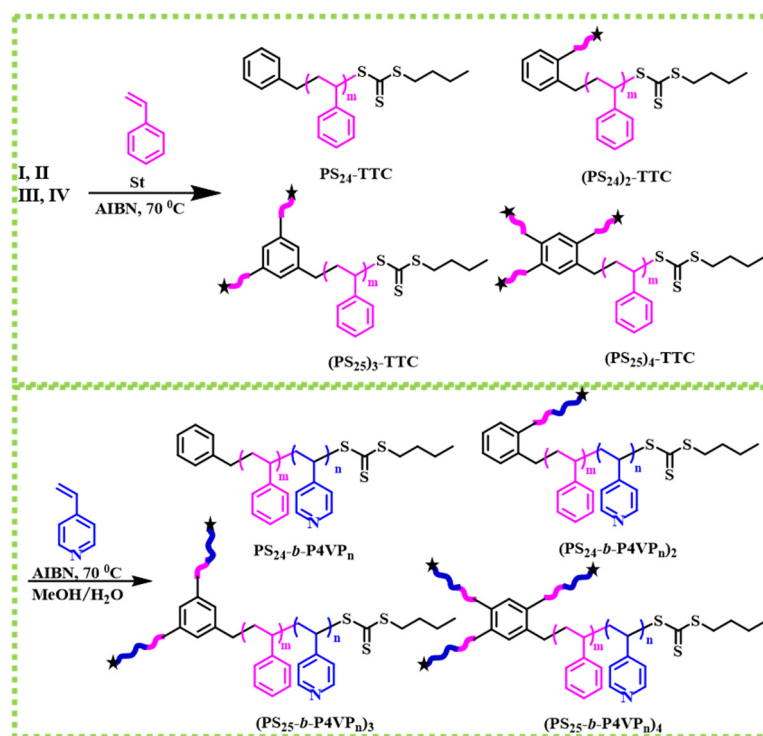

**Scheme S3.** Synthesis of the  $(\text{PS}_m\text{-TTC})_n$  ( $n = 1, 2, 3, 4$ ) macro-RAFT agents and the dispersion RAFT polymerization of 4-vinylpyridine in the presence of  $(\text{PS}_m\text{-TTC})_n$ .
